# Supplementary material for: Effects of clinical pathway implementation on antibiotic prescriptions for pediatric community-acquired pneumonia
Source: PubMed Central journal article supplement (PMC5831636; doi:10.1371/journal.pone.0193581), 2018-02-28
Supplement: pone.0193581.s001.pdf [file pone.0193581.s001.pdf]

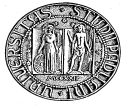

**Exclusion criteria:**  
 Chronic lung disease (except asthma)  
 Immunodeficiency, HIV  
 Tracheostomy  
 Risk factors for aspiration pneumonia  
 IV antibiotic therapy during previous 30 d  
 HA pneumonia (<14 d from previous hosp)

# Community-Acquired Pneumonia Pocket Guide

Children > 90 days

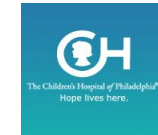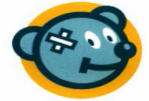

O  
U  
T  
P  
A  
T  
I  
E  
N  
T

**Mild Pneumonia**  
 -Age > 3 months  
 -Absence of respiratory distress  
 -SatO2 > 92% in room air  
 -Non-toxic appearance  
 -Ability to tolerate oral medications and fluids  
 -Adequate observation/follow-up care

Consider Chest X-ray only if diagnosis uncertain. Routine CXRs are not necessary to confirm the CAP diagnosis

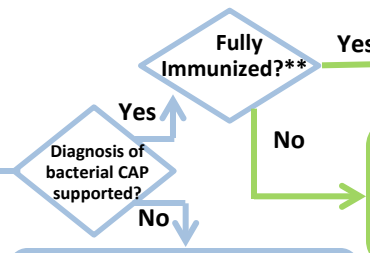

**First line initial therapy:**  
 Amoxicillin 90 mg/kg/day, div Q8hrs; (max: 1g/dose) X 7 d  
 Alternatives if PCN allergy\*\*\*

**No clinical improvement > 48-h**  
 Reassess the patient

I  
N  
P  
A  
T  
I  
E  
N  
T

**Moderate Pneumonia**  
 -Age < 3 months  
 -Moderate-severe dyspnea  
 -SatO2 < 92% in room air  
 -Alteration in mental status  
 -Concern for inadequate outpatient care/FU  
 -Dehydration, vomiting, inability to take oral meds  
 -Clinical concern for inpatient-level observation

**Recommended:** Chest X-ray  
 CBC w/diff, CRP  
**Sometimes recommended:** Blood cx, Respiratory viral panel, Mycoplasma rapid serology\*, Sputum cx (in children that can produce a sputum sample)

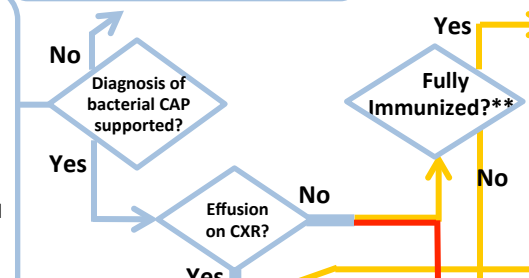

**First line initial therapy:**  
 Ampicillin 200-300 mg/kg/day div Q6hrs max: 2g/dose x 7 d  
 Alternatives if PCN allergy\*\*\*

**Switch from IV to PO and discharge when improving within 48-72 h based upon:** Resp rate, resp effort, fever, O2 requirement  
**Duration:** 7 d or at least 48 h from resolution of fever and tachypnea (whichever is longer), including PO/outpatient therapy

**No clinical improvement > 48 h**  
 Reassess the patient

I  
N  
P  
A  
T  
I  
E  
N  
T  
P  
I  
C  
U

**Severe Pneumonia**  
 -Need for mechanical ventilator support with artificial airway  
 -New or increased CPAP or BiPap support  
 -Severe resp distress or concern for respi failure  
 -Hypoxemia (SatO2 < 90%) despite significant O2 (40% high flow nasal cannula, 100% non-rebreather mask)  
 -Systemic signs of inadequate perfusion  
 -Parapneumonic effusion requiring emergent drainage

**Complicated Pneumonia (moderate parapneumonic effusion)**  
**Clindamycin** 40 mg/kg/day div Q8hrs; max 2.7 g/day  
**AND**  
**Ceftriaxone** 100 mg/kg/day Q24hrs; max: 2 g/dose  
**Alternatives if PCN allergy:**  
 Instead of ceftriaxone  
**Levofloxacin (IV/PO) ≥ 6mo and < 5 yrs:** 20 mg/kg/day div Q12hrs ≥ 5yr: 10 mg/kg/day Q24hrs; max: 500 mg  
**OBTAIN US OF CHEST AND CONSULT GENERAL SURGERY FOR EFFUSIONS REQUIRING DRAINAGE\*\*\*\***  
**Duration:** 7 d from drainage.  
 If not amenable to drainage, 7 d from afebrile

**First line initial therapy:**  
 Ceftriaxone 50-100 mg/kg/day Q24hrs or div Q12hrs or cefotaxime 150 mg/kg/day div Q8hrs  
**Switch from IV to PO and discharge when improving within 48-72 h based upon:** Resp rate, resp effort, fever, O2 requirement  
**Duration:** 7 d, or at least 48 h from resolution of fever and tachypnea (whichever is longer), including PO/outpatient therapy

**Severe Pneumonia (including complicated severe pneumonia)**  
**Vancomycin** 60 mg/kg/day (max 500 mg/dose), div Q6hrs  
**AND**  
**Ceftriaxone** 100 mg/kg/day Q24hrs max: 2 g/dose  
**Alternatives if PCN allergy:**  
**AND**  
**Vancomycin** 60 mg/kg/day (max 500 mg/dose) div Q6hrs  
**AND**  
**Levofloxacin (IV/PO) ≥ 6mo and < 5 yrs:** 20 mg/kg/day div Q12hrs ≥ 5yr: 10 mg/kg/day Q24hrs; max: 500 mg  
**IV-PO Switch and Discharge:** Chest tube out, Feeding well, No O2 requirement, Fever curve trending down, able to take PO abx

**No clinical improvement > 48 h**  
 Reassess the patient

\*Confirmed/Presumed *M. pneumoniae* infection: **Azithromycin:** 10 mg/kg on day 1, single dose (max: 500 mg/day), followed by 5 mg/kg/day, once daily, days 2-5 (max: 250 mg/day) **OR Clarithromycin** 15 mg/kg/day div Q12hrs for 10 days  
 \*\*Not fully immunized for *H. influenzae* type b and *S. pneumoniae* (less than 2 doses)  
 \*\*\* Alternatives if PCN allergy: If not IgE mediated: 2 or 3 generation oral cephalosporin, only for mild pneumonia!! (cefuroxime (30 mg/kg/day div Q12hrs), cefpodoxime, (10 mg/kg/day div Q12hrs) for 7 d, If IgE mediated: Clindamycin (IV) 40 mg/kg/day div Q8hrs; max 2.7 g/day or (PO) 30 mg/kg/day div Q8hrs; max 1.8 g/day, Levofloxacin: (IV/PO) ≥ 6mo and < 5 yrs: 20 mg/kg/day, div Q12hrs ≥ 5yr: 10 mg/kg/day, Q24hrs max: 500 mg  
 \*\*\*\* Large and/or growing in size, Impairing pulmonary function, Organized and loculated

References:  
 The Management of Community-Acquired Pneumonia in Infants and Children Older Than 3 Months of Age: Clinical Practice Guidelines by the Pediatric Infectious Diseases Society and the Infectious Diseases Society of America  
 Harris M et al, British Thoracic Society guidelines for the management of community acquired pneumonia in children: update 2011. Thorax
